# Supplementary material for: Reliable cell cycle commitment in budding yeast is ensured by signal integration
Source: eLife journal article supplement (doi:10.7554/elife.03977), 2015-01-15
Supplement: supp [file elife-03977-supp-v1.zip]

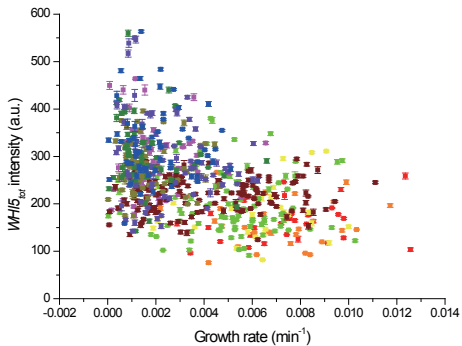

- 2% Glucose+AA
- 2% Sucrose+AA
- 2% Fructose+AA
- 2% Raffinose+AA
- 2% Galactose+AA
- 2% Maltose+AA
- 2% Glycerol+AA
- 2% Ethanol+AA
- 2% Glucose+0.05mM  $(\text{NH}_4)_2\text{SO}_4$
- 0.01% Glucose+AA
- 0.005% Glucose+AA
