# Supplementary material for: Reliable cell cycle commitment in budding yeast is ensured by signal integration
Source: eLife journal article supplement (doi:10.7554/elife.03977), 2015-01-15

**A**

tttgtgtttccgggtgtacaatatggacttcctcttttctggcaaccaaaccatacatc  
 gggattcctataataccttcgttggtctccctaacatgtaggtggcggaggggagata  
 tacaatagaacagataccagacaagacataatgggctaaacaagactacaccaa  
 ttacactgcctcattgatgggtggtacataacgaactaatactgtagccctagacttgat  
 agccatcatcatatcgaagttcactacccttttccattgccatctattgaagtaataat  
 aggcgcatgcaacttctttcttttttctttctctctccccggtgtgtgtctcaccatatccg  
 caatgacaaaaaatgatggaagacactaaaggaaaaaattaacgacaaagac  
 agcaccaacagatgtcgttggtccagagctgatgaggggtatctcgaagcacacga  
 aacttttcttcttctcattcacgcacactactctctaatgagcaacggtatacggaattg

tgagcggataacaatttttgaaataaaaaaagttgccgcttgctatcaagtataaata  
 lacO1 TATA box

gacctgcaattattaatctttgtttcaattgtgagcggataacaatttttcttcttgtttcttt  
 lacO1

tctgcacaatatttcaagctataccaagcatacaatcaact

**B**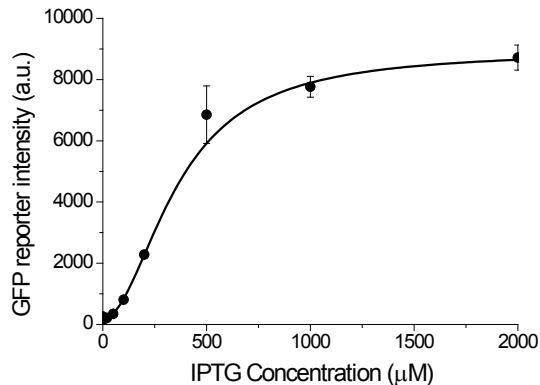

Supplement: supp [file elife-03977-supp-v1.zip]
