# Supplementary material for: Reliable cell cycle commitment in budding yeast is ensured by signal integration
Source: eLife journal article supplement (doi:10.7554/elife.03977), 2015-01-15
Supplement: supp [file elife_poa_e03977_Figure_4_source_data_1.docx]

|  | Growth rate (min-1) | | | | *WHI5tot* intensity (a.u.) | | | |
| --- | --- | --- | --- | --- | --- | --- | --- | --- |
| Nutrient condition | N | Mean | Std. | CV | N | Mean | Std. | CV |
| 2% Glucose + AA | 34 | 0.0072 | 0.0023 | 0.32 | 183 | 123.95 | 46.06 | 0.37 |
| 2% Sucrose + AA | 30 | 0.0065 | 0.0026 | 0.39 | 220 | 114.23 | 43.39 | 0.38 |
| 2% Fructose + AA | 27 | 0.0063 | 0.0022 | 0.35 | 200 | 123.15 | 53.26 | 0.43 |
| 2% Raffinose + AA | 51 | 0.0055 | 0.0019 | 0.34 | 214 | 120.58 | 41.67 | 0.35 |
| 2% Galactose + AA | 39 | 0.0045 | 0.0023 | 0.52 | 194 | 182.11 | 70.91 | 0.39 |
| 2% Maltose + AA | 63 | 0.0021 | 0.0013 | 0.62 | 216 | 282.51 | 67.29 | 0.24 |
| 2% Glycerol + AA | 70 | 0.0026 | 0.0016 | 0.62 | 231 | 261.07 | 90.56 | 0.35 |
| 2% Ethanol + AA | 60 | 0.0020 | 0.0013 | 0.62 | 208 | 330.19 | 97.29 | 0.29 |
| 2% Glucose + (NH4)2SO4 | 134 | 0.0041 | 0.0025 | 0.61 | 272 | 208.69 | 44.10 | 0.21 |
| 0.01% Glucose + AA | 74 | 0.0018 | 0.0011 | 0.63 | 200 | 274.62 | 54.59 | 0.20 |
| 0.005% Glucose + AA | 56 | 0.0017 | 0.0013 | 0.79 | 146 | 319.60 | 77.80 | 0.24 |
