# Supplementary figures and images for: Reliable cell cycle commitment in budding yeast is ensured by signal integration
Source: eLife journal article supplement (doi:10.7554/elife.03977), 2015-01-15

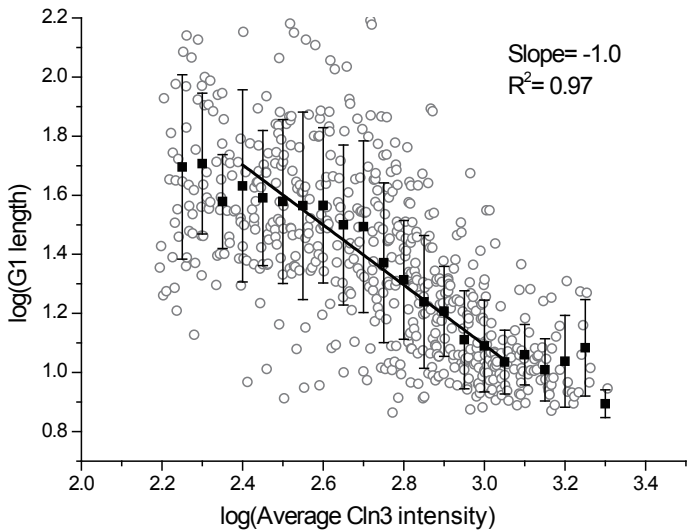

Supplement: supp [file elife-03977-supp-v1.zip]

**A**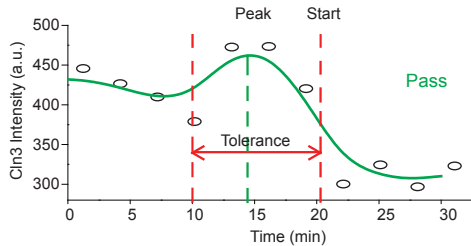**B**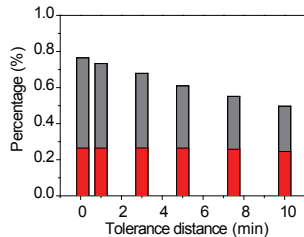**C**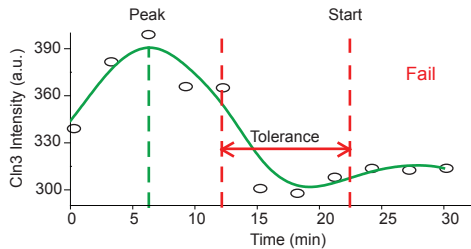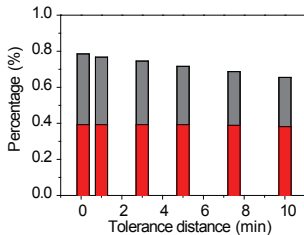

Supplement: supp [file elife-03977-supp-v1.zip]

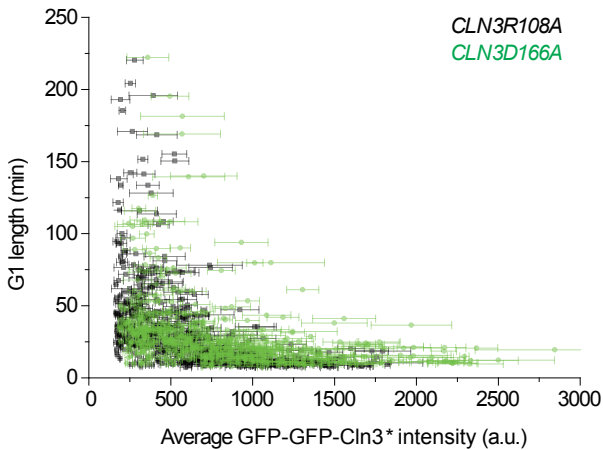

Supplement: supp [file elife-03977-supp-v1.zip]

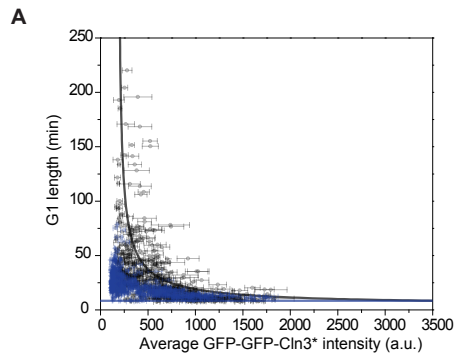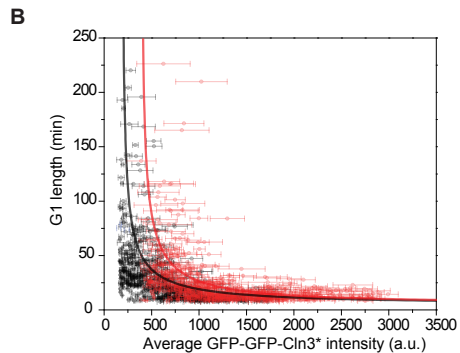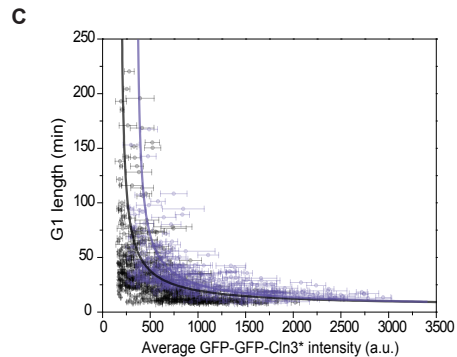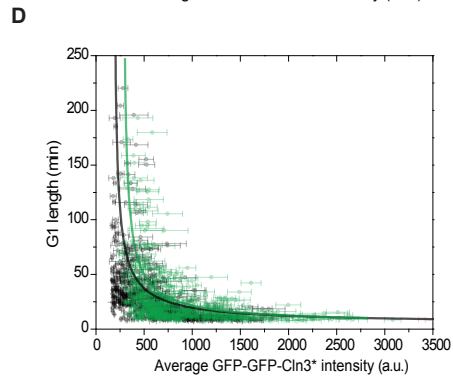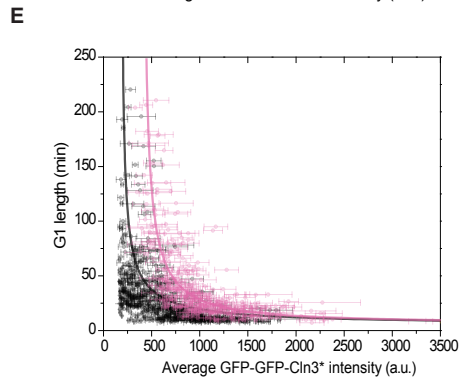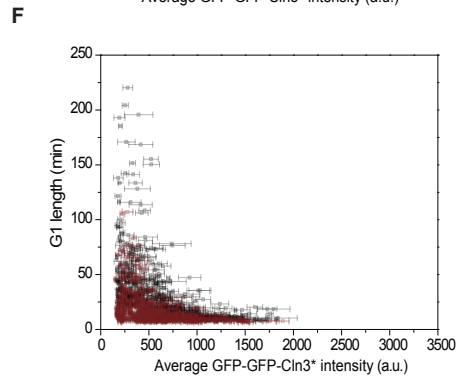

Supplement: supp [file elife-03977-supp-v1.zip]

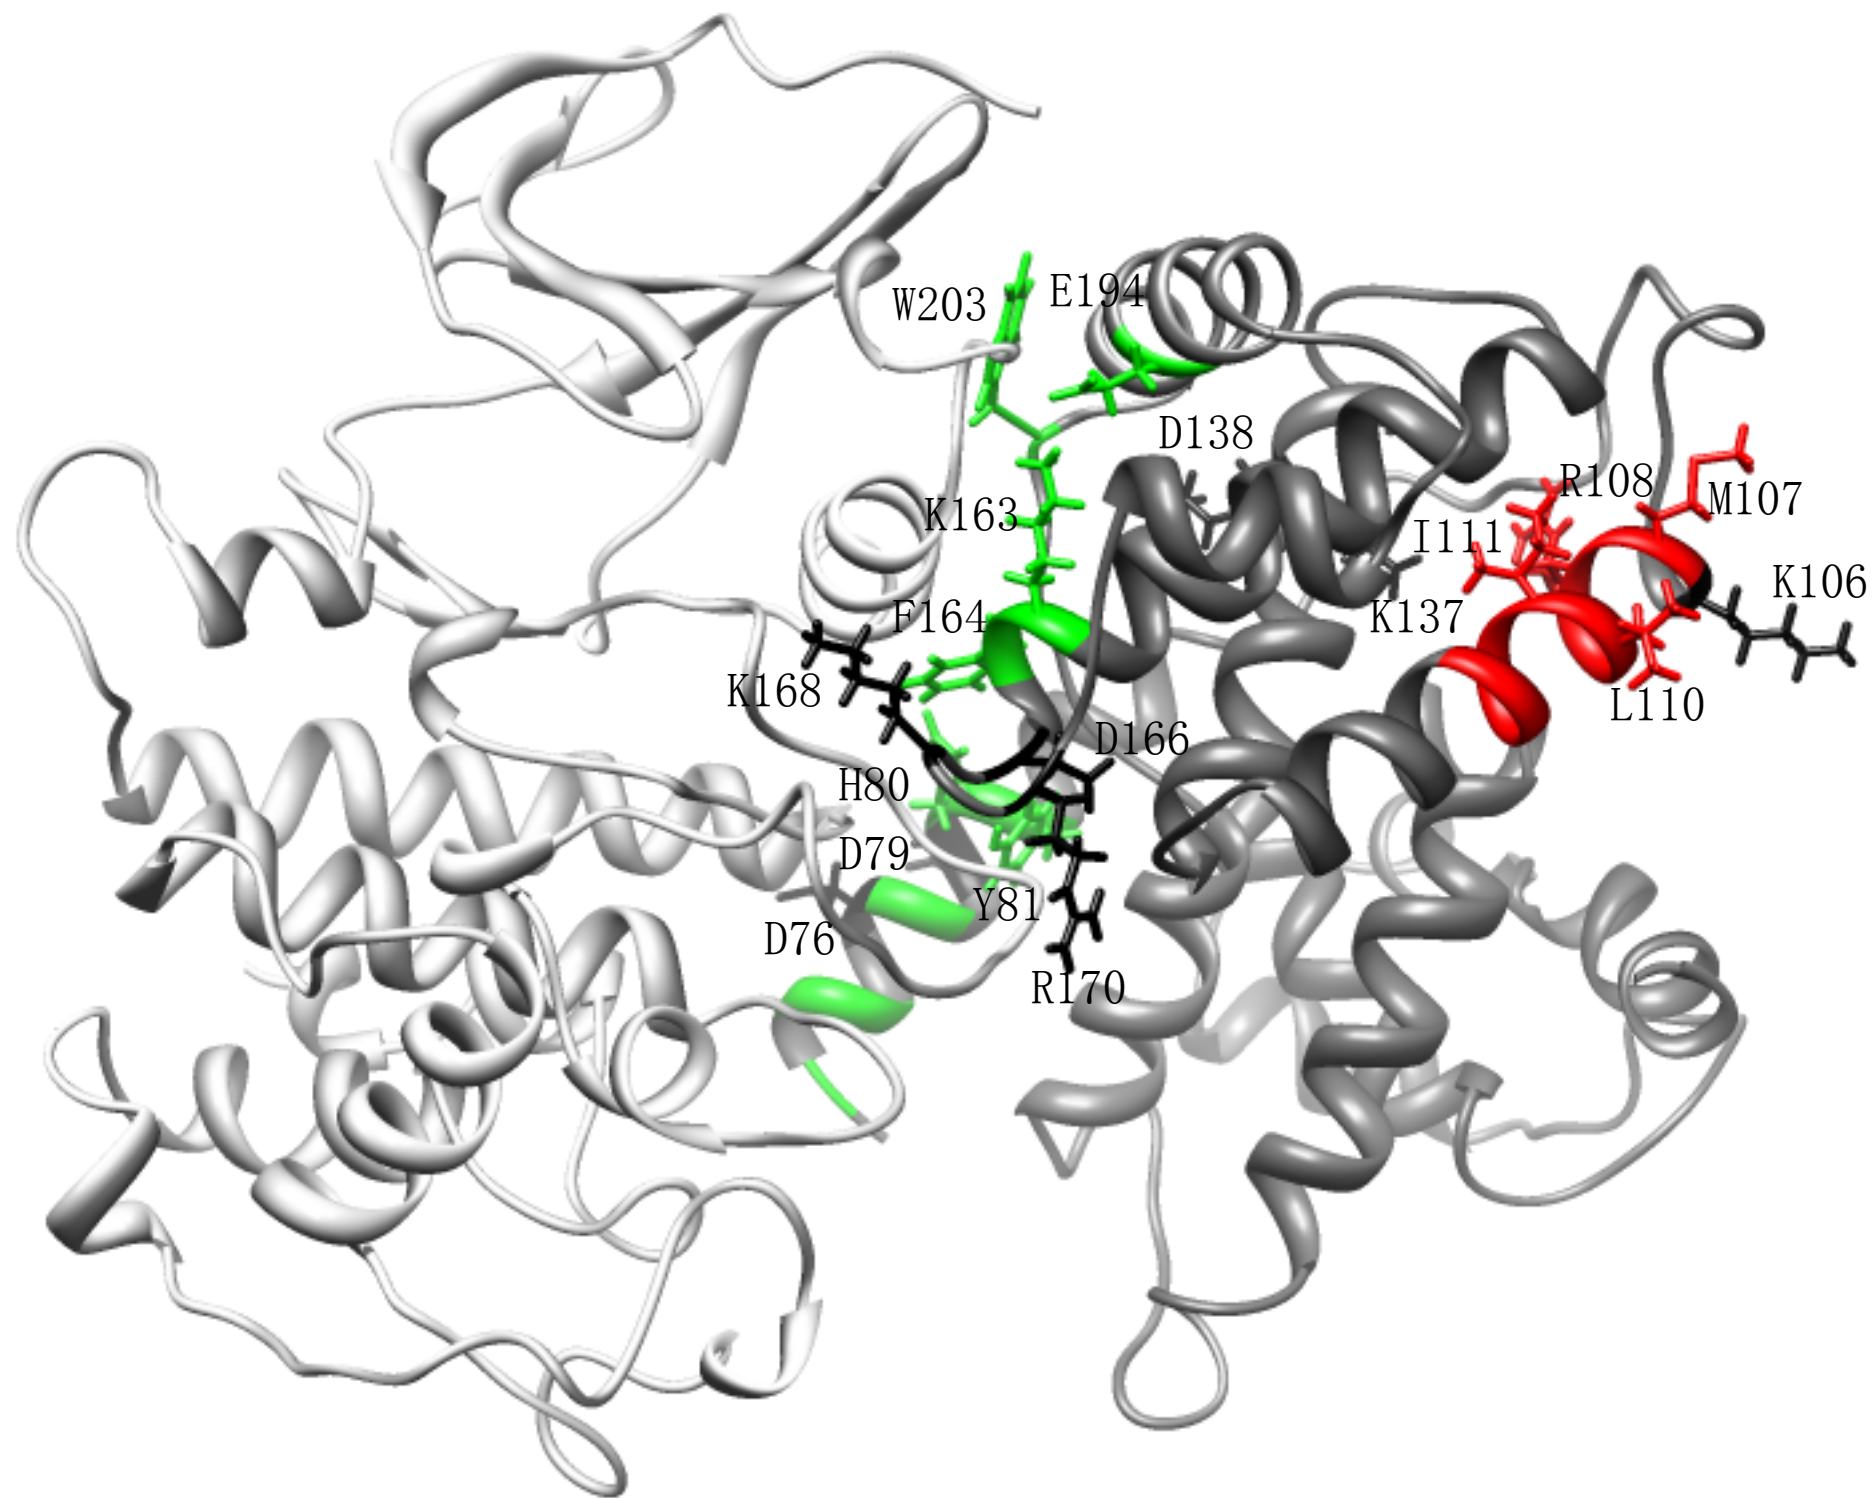

Supplement: supp [file elife-03977-supp-v1.zip]

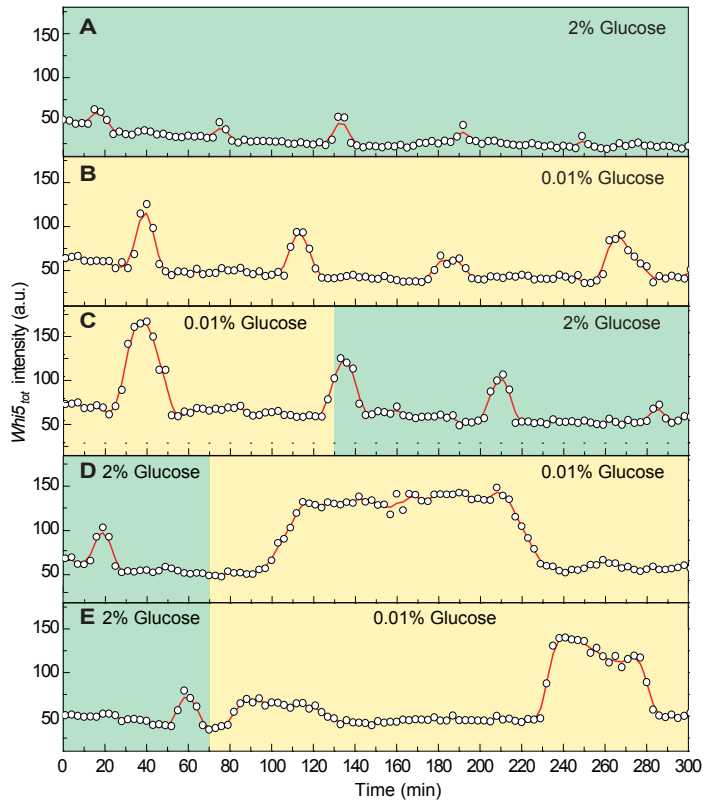

### 0.01% Glucose to 2% Glucose

**F**

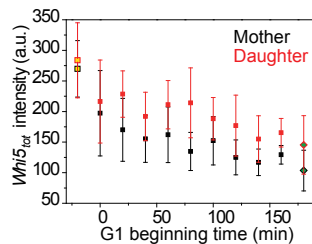

**G**

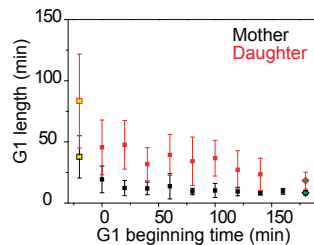

### 2% Glucose to 0.01% Glucose

**H**

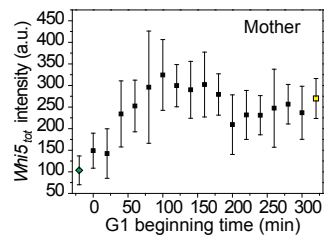

**I**

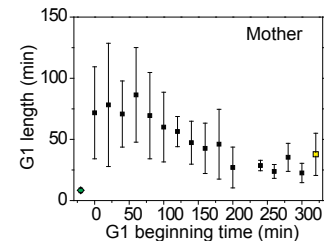

Supplement: supp [file elife-03977-supp-v1.zip]

**A**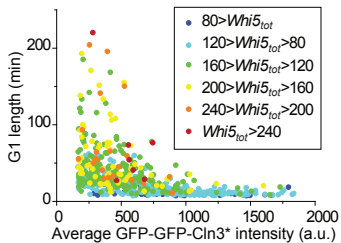**B**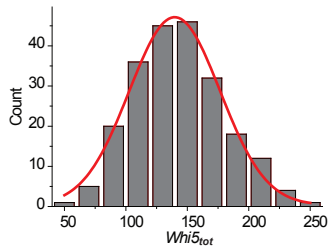**C**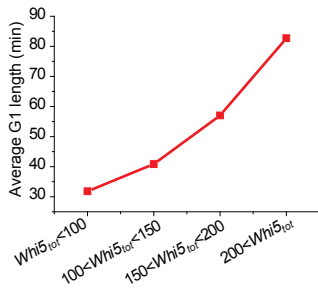**D**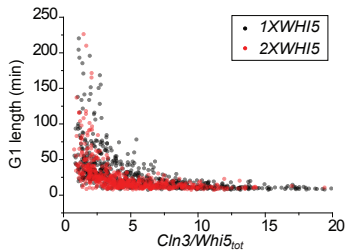

Supplement: supp [file elife-03977-supp-v1.zip]

**A**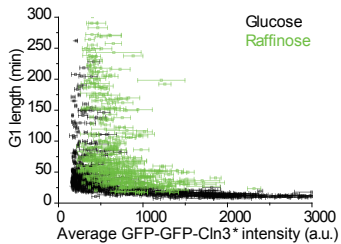**B**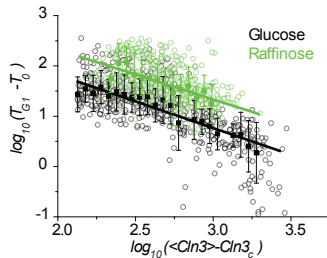**C**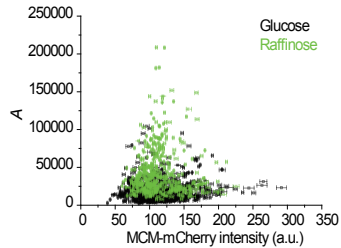**D**

|           | $Cln3_c$ | $T_0$ | Slope | Y Intercept | $R^2$ |
|-----------|----------|-------|-------|-------------|-------|
| Glucose   | 29       | 12    | -1.06 | 3.94        | 0.91  |
| Raffinose | 66       | 12    | -0.99 | 4.31        | 0.78  |

Supplement: supp [file elife-03977-supp-v1.zip]

**A**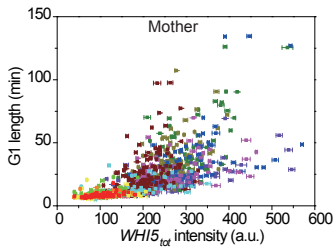**B**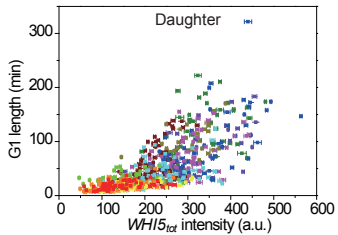

Supplement: supp [file elife-03977-supp-v1.zip]

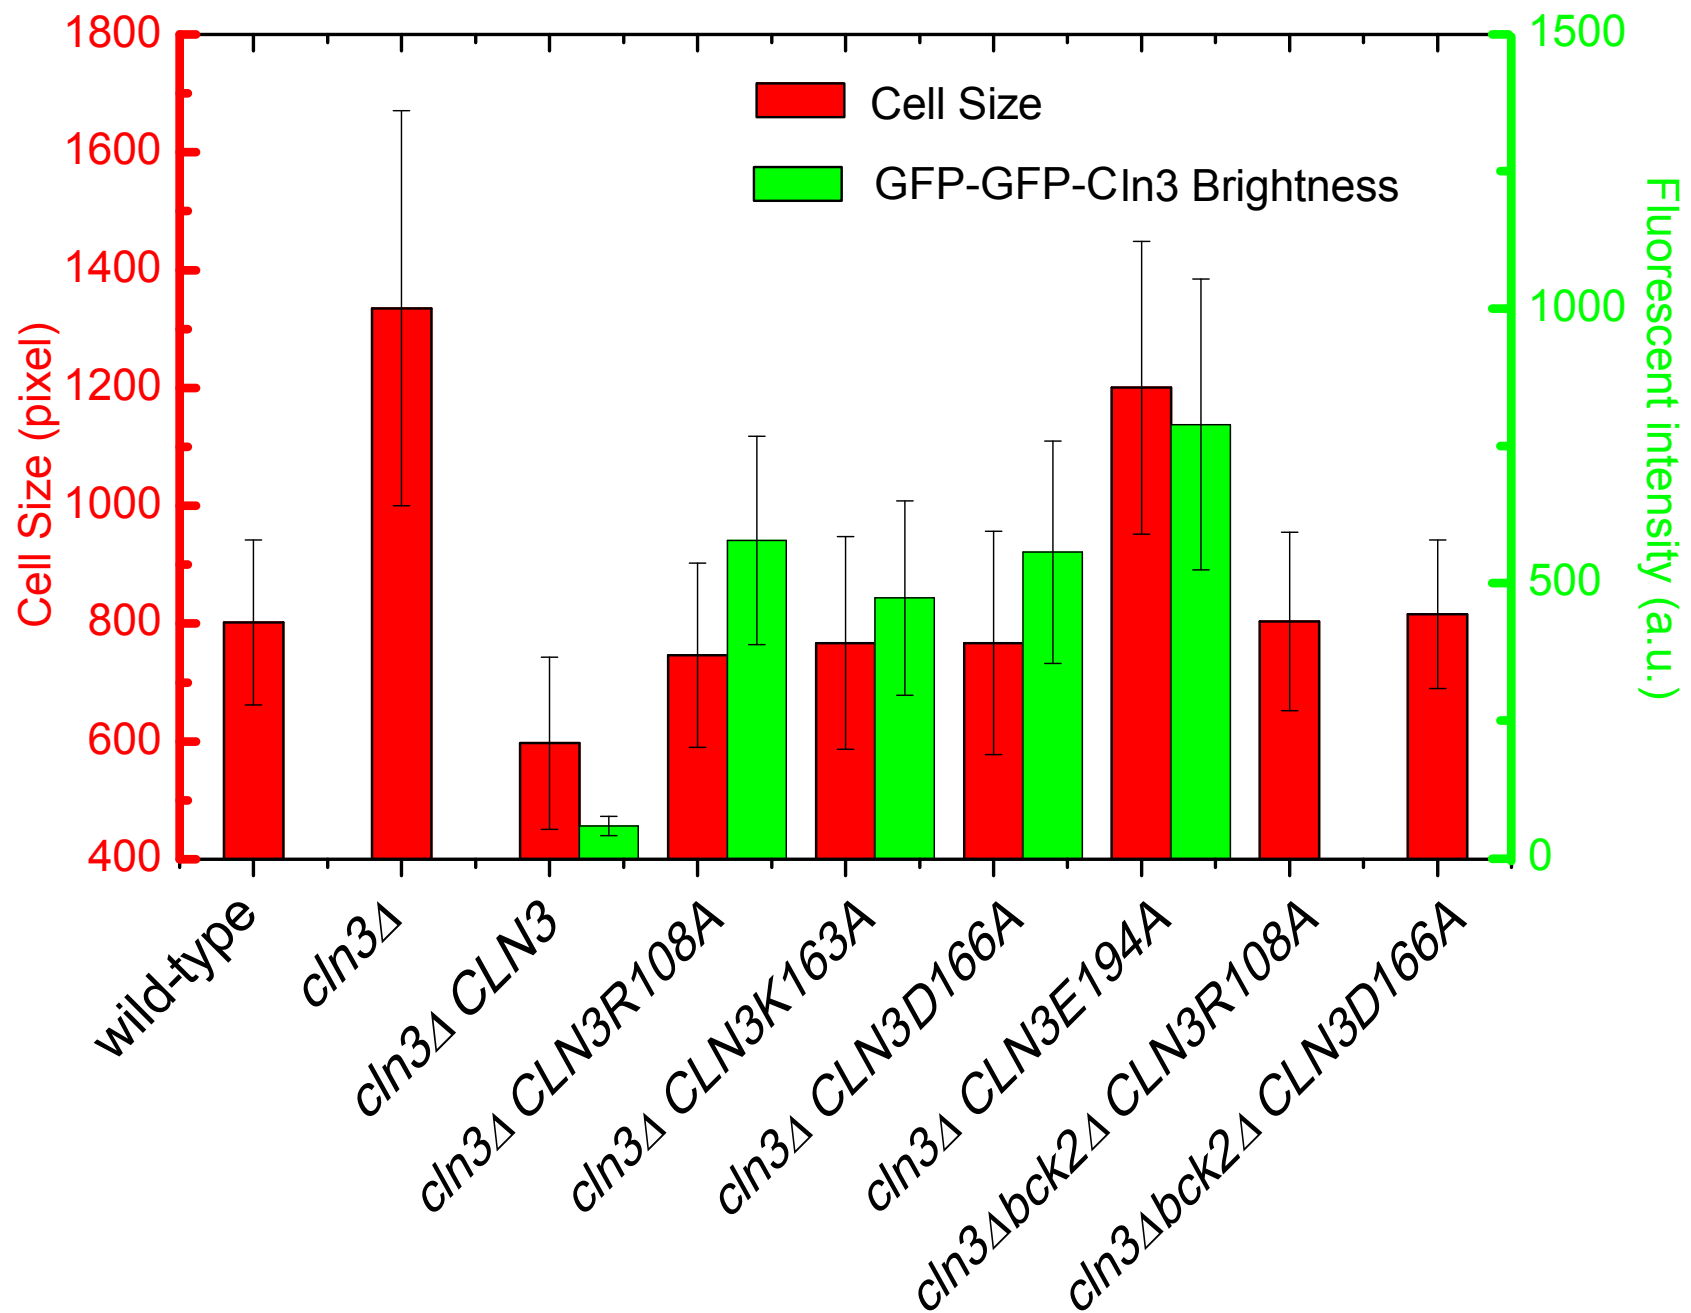

Supplement: supp [file elife-03977-supp-v1.zip]

**A**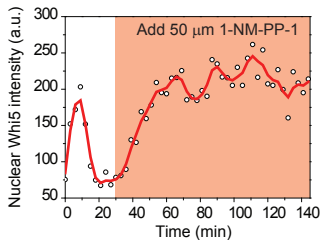**B**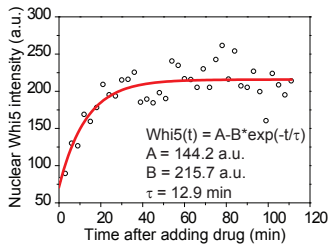**C**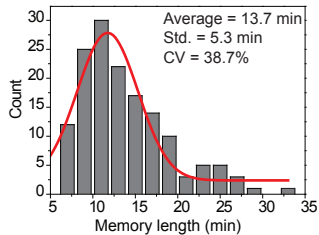**D**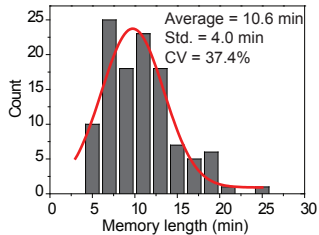

Supplement: supp [file elife-03977-supp-v1.zip]

**A**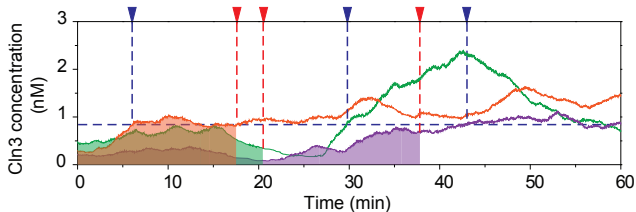**B****intrinsic noise**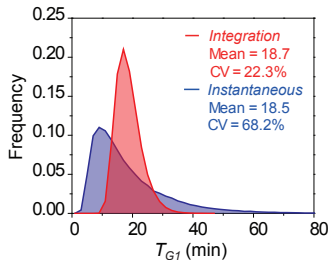**C****+ extrinsic noise**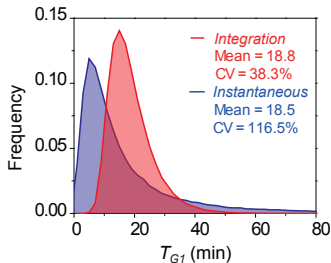

Supplement: supp [file elife-03977-supp-v1.zip]

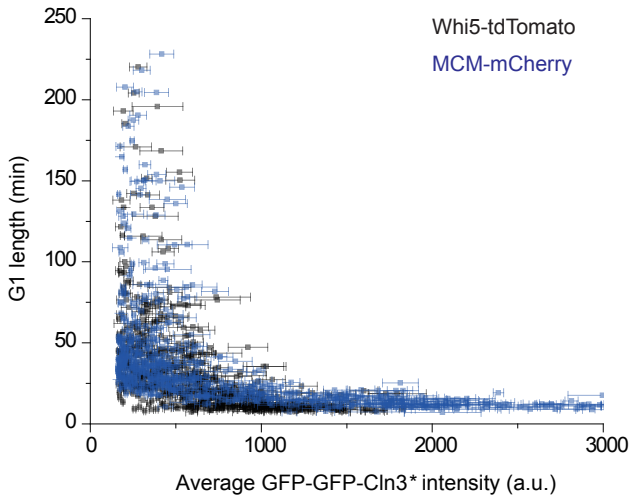

Supplement: supp [file elife-03977-supp-v1.zip]

**A**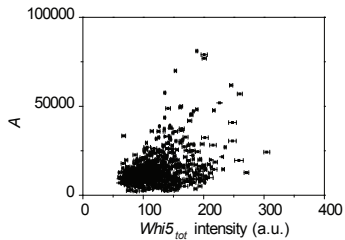**B**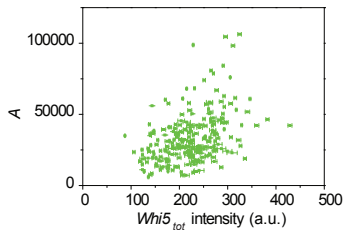**C**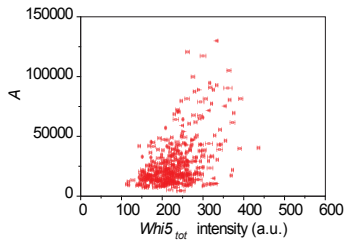**D**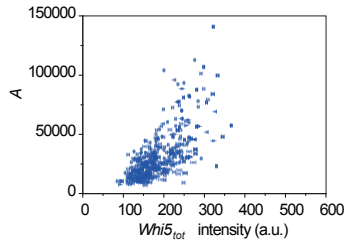

Supplement: supp [file elife-03977-supp-v1.zip]

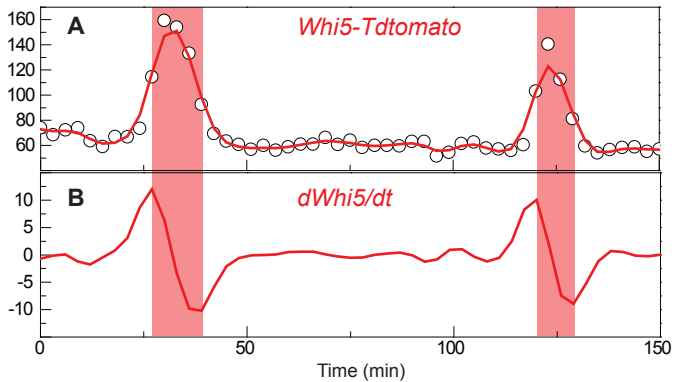

Supplement: supp [file elife-03977-supp-v1.zip]

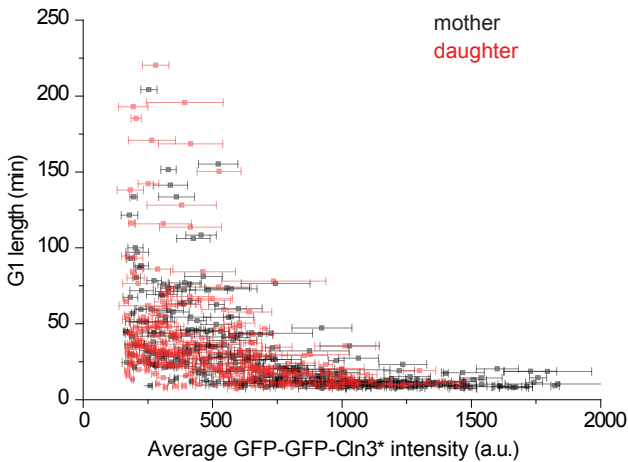

Supplement: supp [file elife-03977-supp-v1.zip]

**A**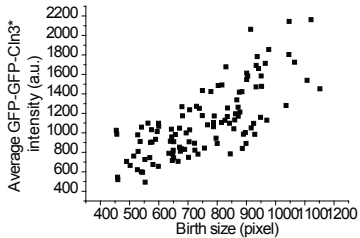**B**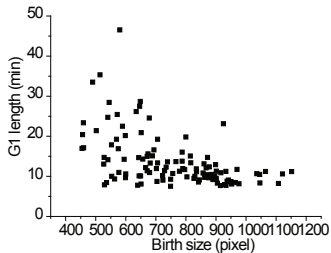

Supplement: supp [file elife-03977-supp-v1.zip]

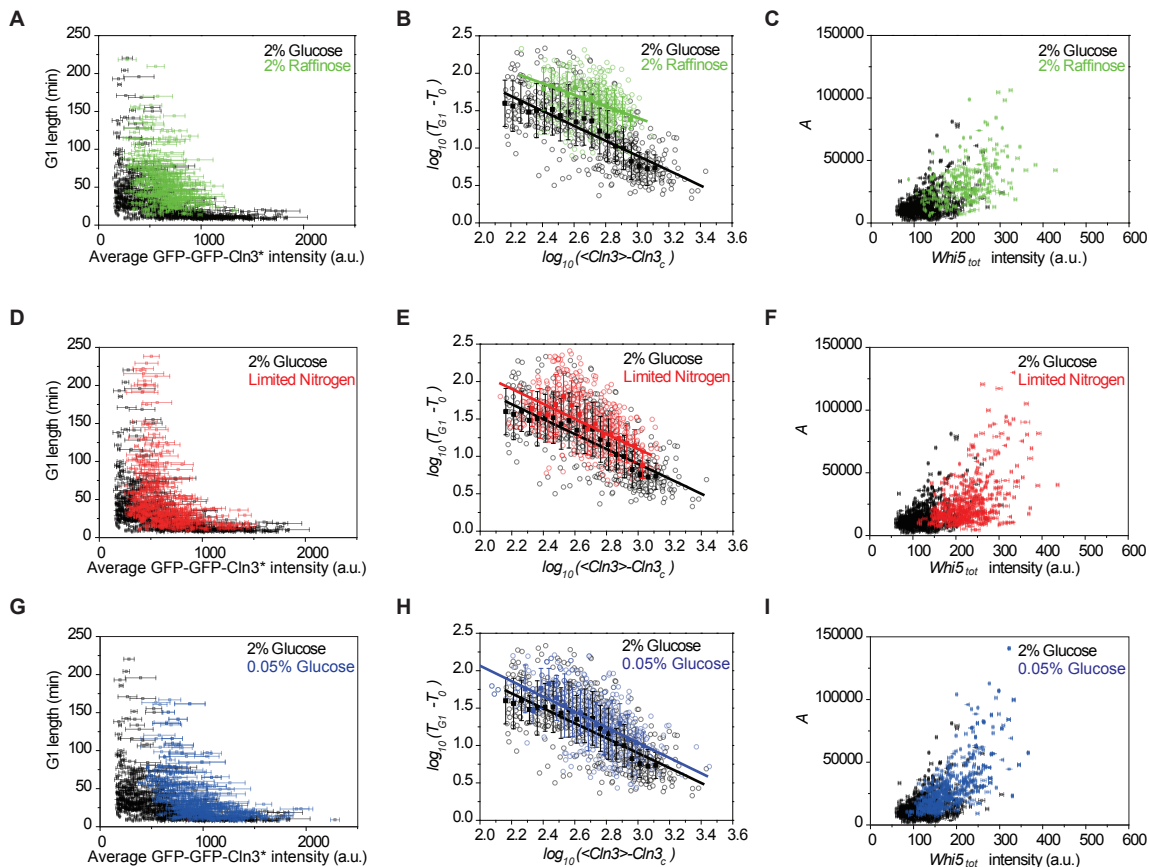

**J**

|                  | $Cln3_c$ | $T_0$ | Slope | Y Intercept | $R^2$ |
|------------------|----------|-------|-------|-------------|-------|
| 2% Glucose       | 20       | 5     | -0.99 | 3.89        | 0.91  |
| 2% Raffinose     | 94       | 5     | -0.77 | 3.71        | 0.91  |
| Limited Nitrogen | 128      | 5     | -1.00 | 4.11        | 0.78  |
| 0.05% Glucose    | 380      | 5     | -1.03 | 4.12        | 0.85  |

Supplement: supp [file elife-03977-supp-v1.zip]
